# Supplementary material for: MicroTools enables automated quantification of capillary density and red blood cell velocity in handheld vital microscopy
Source: PubMed Central journal article supplement (PMC6584696; doi:10.1038/s42003-019-0473-8), 2019-06-19
Supplement: 42003_2019_473_MOESM1_ESM.pdf [file 42003_2019_473_MOESM1_ESM.pdf]

## Supplementary Tables

| <i>HVM device</i> | <i>Video format</i>             | <i>Description</i>                    | <i>Approximate field of view</i> | <i>Approximate pixel pitch</i> * |
|-------------------|---------------------------------|---------------------------------------|----------------------------------|----------------------------------|
| Cytocam IDF       | avi, $\leq 716 \times 572$ px   | CCtools AVA 3.x export                | 0.5898 mm <sup>2</sup>           | 1.2 $\mu\text{m px}^{-1}$        |
| Cytocam IDF       | mha, $\leq 2208 \times 1648$ px | CCtools 1.7.x native recording format | 1.7830 mm <sup>2</sup>           | 0.7 $\mu\text{m px}^{-1}$        |
| Microscan SDF     | avi, $\leq 716 \times 572$ px   | AVA 3.x native recording format       | 0.5898 mm <sup>2</sup>           | 1.2 $\mu\text{m px}^{-1}$        |

*Supplementary Table 1. Combinations of HVM recording devices and video formats. “ $\leq$ ” denotes the possibility of frame downsizing during stabilization procedures preceding analysis. \* field of view and pixel pitch were determined for each combination of individual HVM recording device and video format using a formal calibration procedure, approximate mean values are given here for reference. IDF, incident dark field; SDF, sidestream dark field.*

| <i>Symbol</i>                            | <i>Description</i>                                                                                                                                                | <i>Parameter values</i>                                              |  |
|------------------------------------------|-------------------------------------------------------------------------------------------------------------------------------------------------------------------|----------------------------------------------------------------------|--|
|                                          |                                                                                                                                                                   | <i>Cytocam IDF, porcine sublingual microcirculation, AVA 3.x avi</i> |  |
| <i>Vessel recognition</i>                |                                                                                                                                                                   |                                                                      |  |
| clahe_clip                               | Contrast enhancement limit for contrast limited adaptive histogram equalization.                                                                                  | 2, 0                                                                 |  |
| clahe_grid [px]                          | Grid size for contrast limited adaptive histogram equalization.                                                                                                   | 32, 0                                                                |  |
| $\sigma$ [px]                            | Standard deviation of the the Gaussian kernel used for principal curvature-based region detection <sup>37</sup> .                                                 | 3, 9                                                                 |  |
| h [px]                                   | Upper threshold for the linking algorithm, where new lines are created as long as the starting point has a higher second directional derivative <sup>37</sup> .   | 1.1, 0.1                                                             |  |
| l [px]                                   | Lower threshold for the linking algorithm, where points are added to the current line as long as they have a higher second directional derivative <sup>37</sup> . | 0, 0                                                                 |  |
| min_length [px]                          | Threshold for a high-pass filter for vessel length implemented downstream of the detection and linking algorithms.                                                | 40, 120                                                              |  |
| capillary_cutoff [ $\mu\text{m}$ ]       | Low-pass cutoff value for mean vessel diameter used for vessel classification as a capillary.                                                                     | 20                                                                   |  |
| <i>Space-time diagram analysis</i>       |                                                                                                                                                                   |                                                                      |  |
| smooth_ $\sigma$ [px]                    | Standard deviation of the Gaussian kernel used for Gaussian smoothing.                                                                                            | 1                                                                    |  |
| $\sigma$ [px]                            | Standard deviation of the Gaussian kernel used for principal curvature-based region detection <sup>37</sup> .                                                     | 1.5                                                                  |  |
| h [px]                                   | Upper threshold for the linking algorithm, where new lines are created if the starting point has a higher second directional derivative <sup>37</sup> .           | 1.1                                                                  |  |
| l [px]                                   | Lower threshold for the linking algorithm, where points are added to the current line if they have a higher second directional derivative <sup>37</sup> .         | 0                                                                    |  |
| min_length [px]                          | High-pass cutoff value for artefact detection: Threshold for a high-pass filter for vessel length implemented downstream of the detection and linking algorithms. | 20                                                                   |  |
| curvature_index_cutoff [1]               | High-pass cutoff value for artefact detection: proportion of length of straight line between start and endpoint of ridge AND actual ridge length.                 | 0.02                                                                 |  |
| low_flow_cutoff [ $\mu\text{m s}^{-1}$ ] | Low-pass cutoff value for individual RBC path RBCv for RBC path classification of no flow/low flow versus normal flow.                                            | 10                                                                   |  |
| perfused_cutoff [1]                      | High-pass cutoff value for the proportion of no flow / low flow RBC paths in a per-vessel frequency distribution used for vessel classification as perfused.      | 0.1                                                                  |  |

*Supplementary Table 2. Set of parameters for vessel detection and space-time diagram analysis using the proposed advanced computer vision algorithm. \* depending on validation of combinations of tissue type, HVM recording devices and video formats.*

## Supplementary Figures

Supplementary Figure 1. Good correlation was observed between manually measured and algorithm-based FCD (A) and PPV (B) in the septic shock model.

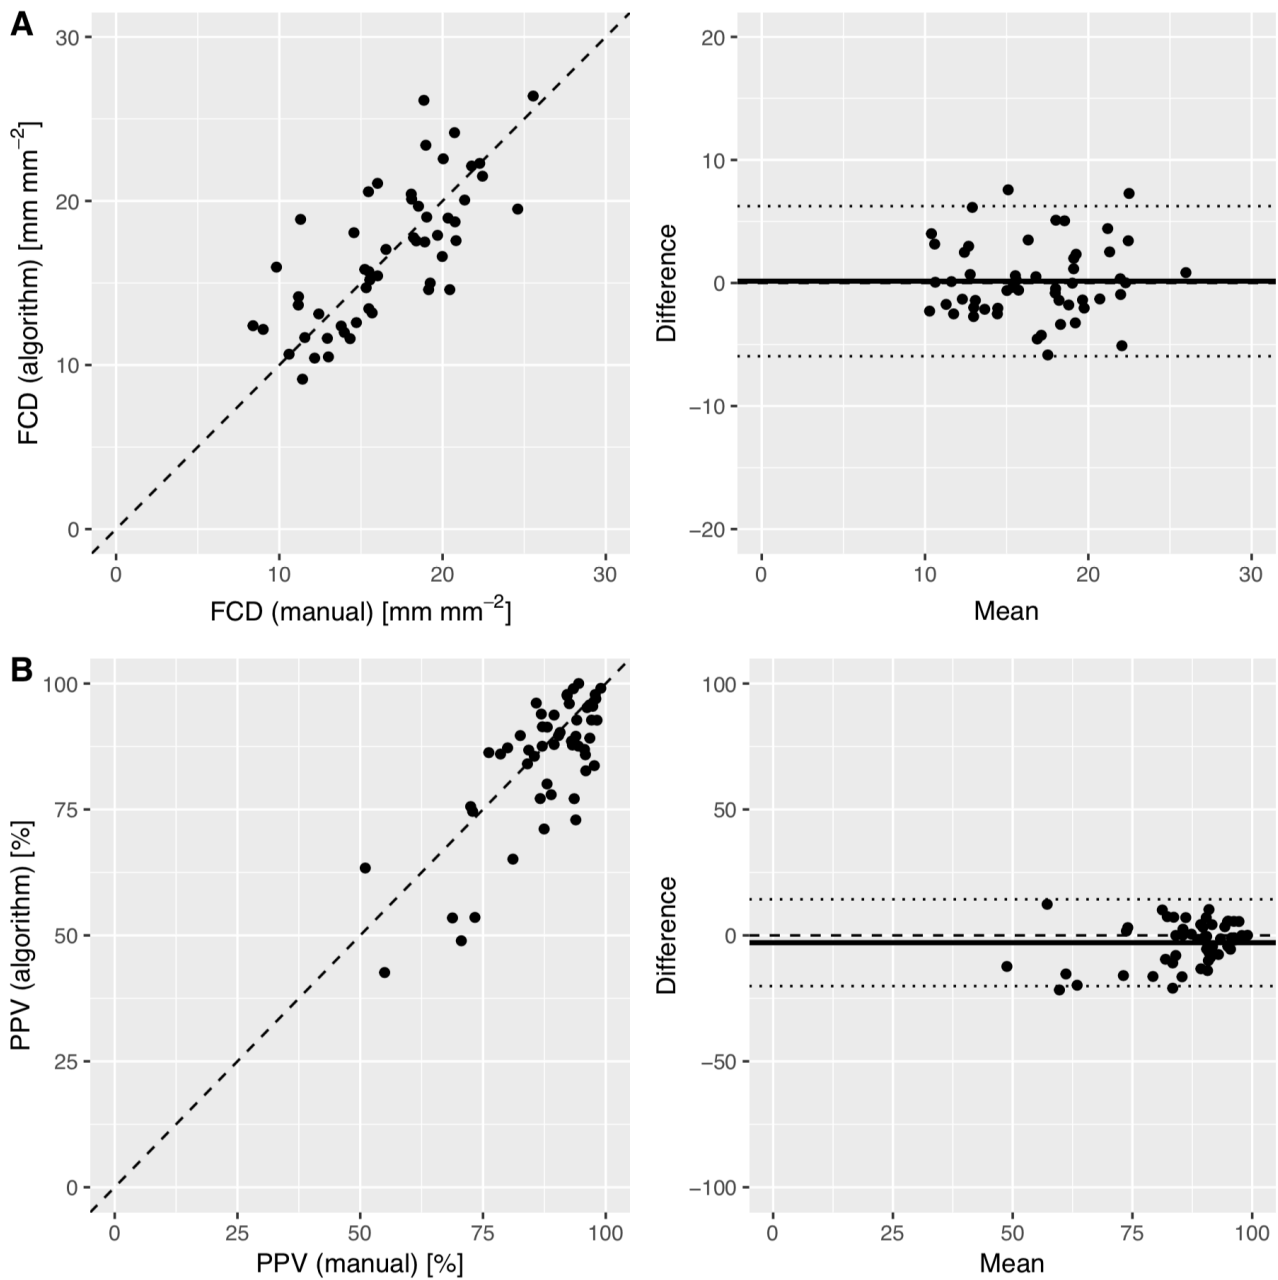

FCD and PPV were compared by field of view in the septic shock and control groups ( $n = 53$ ). Good correlation was observed for FCD ( $r = 0.7$ ,  $p < 0.0001$ , bias  $0.2 \text{ mm mm}^{-2}$ , level of agreement  $-6.0\text{--}6.3 \text{ mm mm}^{-2}$ , precision  $3.1 \text{ mm mm}^{-2}$ , percentage error 2.9%) and PPV ( $r = 0.8$ ,  $p < 0.0001$ , bias  $-3\%$ , level of agreement  $-20\text{--}14\%$ , precision 9%, percentage error  $-3.3\%$ ). Dashed lines represent identity lines. In Bland-Altman analysis, solid line represents bias and dotted lines represent  $\pm 2\sigma$  levels of agreement. FCD, functional capillary density; PPV, proportion of perfused vessels.
